# Supplementary material for: Synergistic Anticancer Effect of a Combination of Berbamine and Arcyriaflavin A against Glioblastoma Stem-like Cells
Source: MDPI journal article supplement (doi:10.3390/molecules27227968), 2022-11-17
Supplement: s1 [file s1]

# Synergistic Anticancer Effect of a Combination of Berbamine and Arcyriaflavin A against Glioblastoma Stem-like Cells

Jang Mi Han <sup>1</sup> and Hye Jin Jung <sup>1,2,3,\*</sup>

<sup>1</sup> Department of Life Science and Biochemical Engineering, Graduate School, Sun Moon University, Asan 31460, Republic of Korea

<sup>2</sup> Department of Pharmaceutical Engineering and Biotechnology, Sun Moon University, Asan 31460, Republic of Korea

<sup>3</sup> Genome-Based BioIT Convergence Institute, Sun Moon University, Asan 31460, Republic of Korea

\* Correspondence: poka96@sunmoon.ac.kr; Tel.: +82-41-530-2354; Fax: +82-41-530-2939

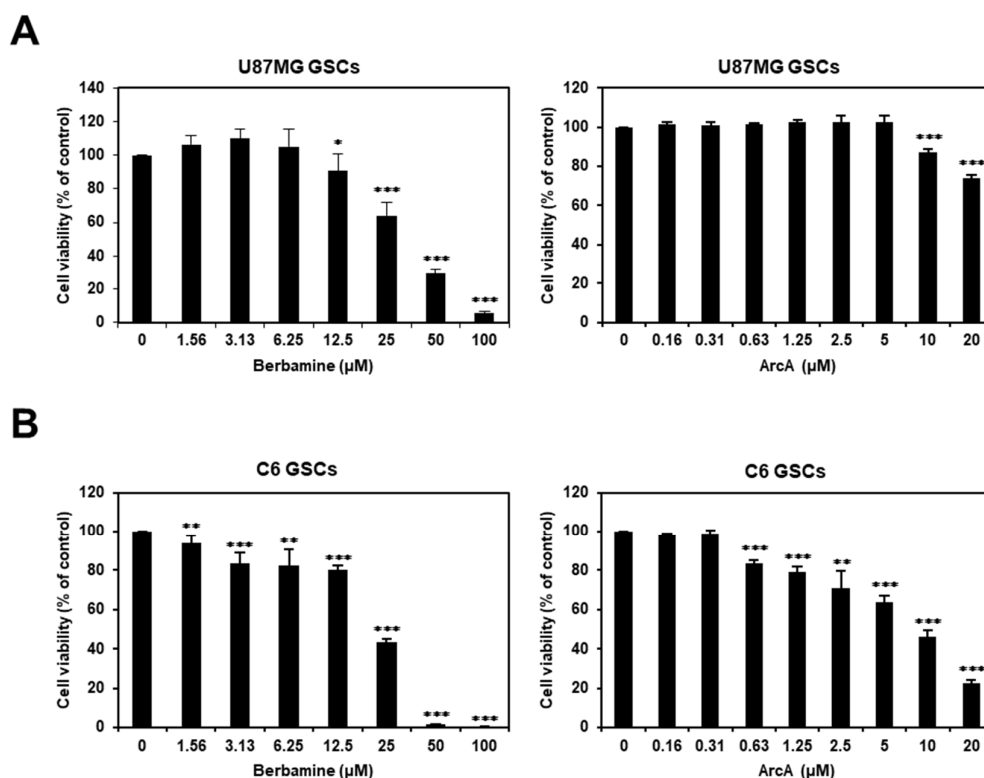

**Figure S1.** Effect of berbamine and ArcA on the viability of GSCs. (A) U87MG-derived GSCs were treated with the indicated concentrations of berbamine or ArcA for 7 days. (B) C6-derived GSCs were treated with the indicated concentrations of berbamine or ArcA for 7 days. Cell viability was measured using the CellTiter-Glo<sup>®</sup> luminescent assay system. \*  $p < 0.05$ , \*\*  $p < 0.01$ , \*\*\*  $p < 0.001$  vs. the control.

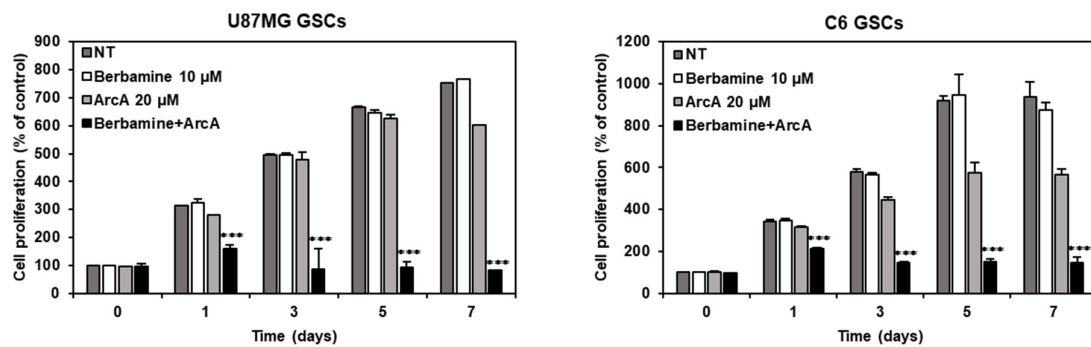

**Figure S2.** Effect of combined treatment with berbamine and ArcA on the proliferation of GSCs. U87MG- and C6-derived GSCs were treated with 10  $\mu$ M berbamine and 20  $\mu$ M ArcA for 7 days and cell proliferation was measured using the ATP-monitoring luminescence assay. \*\*\*  $p < 0.001$  vs. the compound alone.

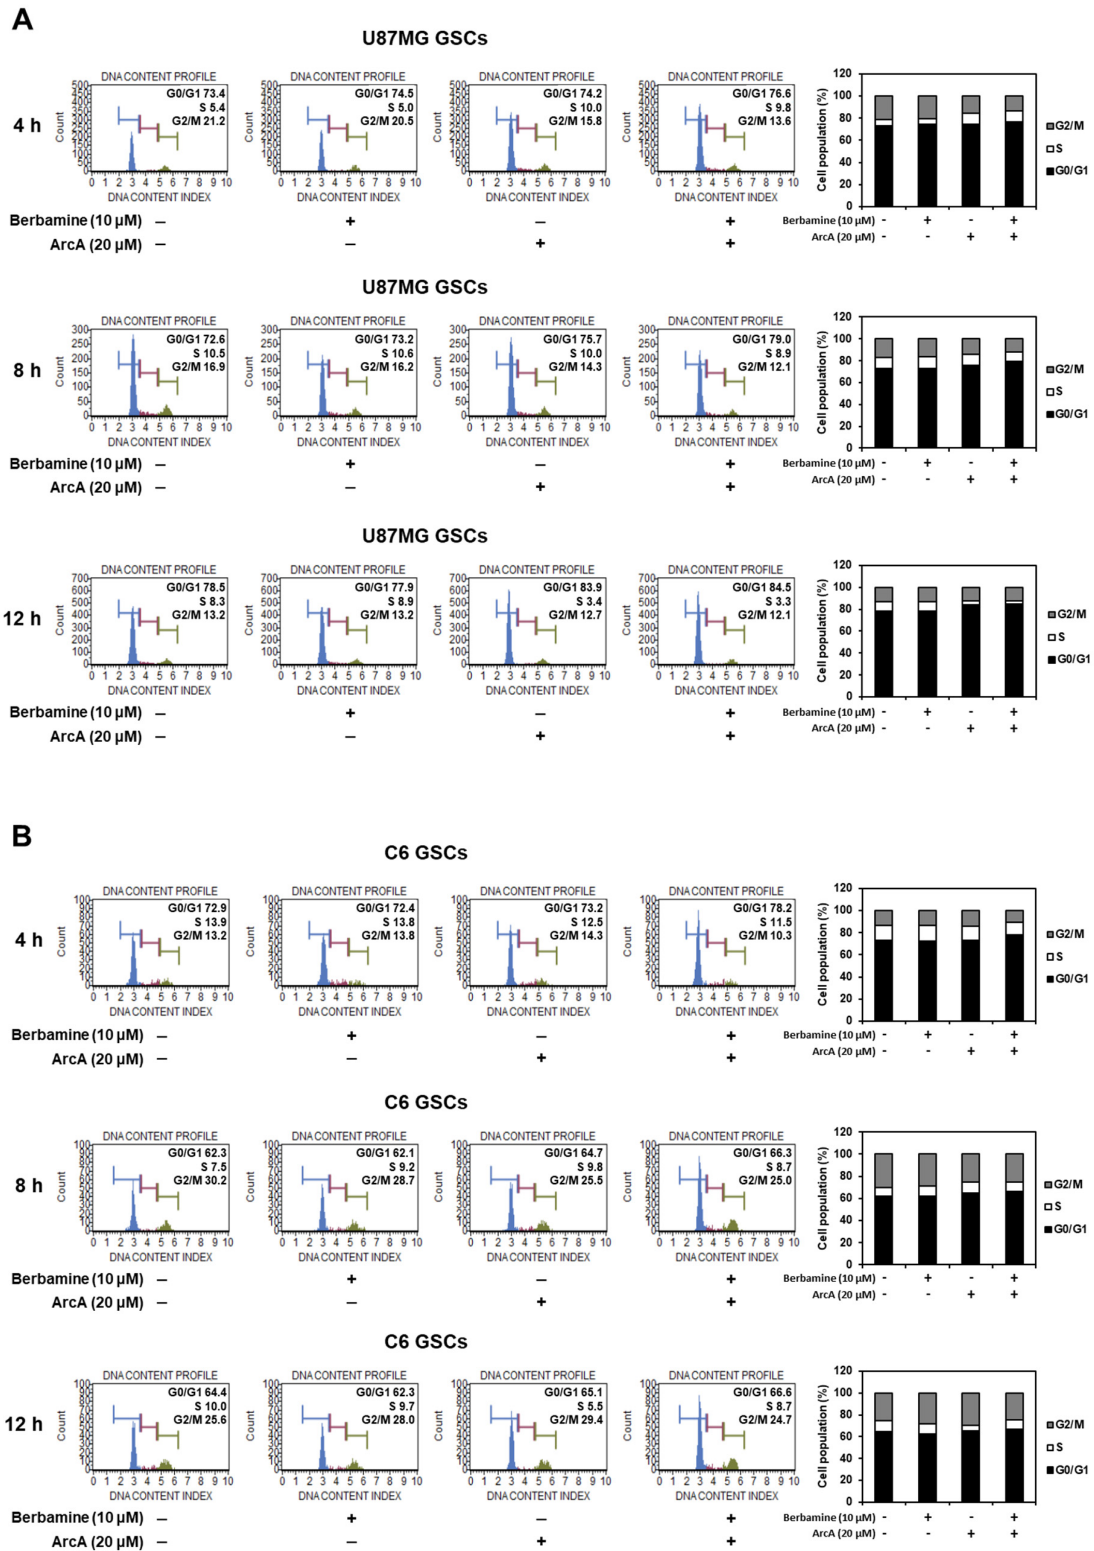

**Figure S3.** Effect of combined treatment with berberine and ArcA on the cell cycle in GSCs. (A) U87MG- and (B) C6-derived GSCs were treated with berberine (10  $\mu$ M) and ArcA (20  $\mu$ M) for 4, 8, and 12 h. Cell cycle distribution was detected using a Muse Cell Analyzer with Muse® Cell Cycle kit.
